# Supplementary material for: Subseasonal-to-seasonal forecasts of Heat waves in West African cities
Source: Copernicus journal article supplement (doi:10.5194/nhess-2023-144), 2023-08-10
Supplement: Supplementary file [file nhess-2023-144-AC2-supplement.pdf]

**Review of:**

**Subseasonal-to-seasonal forecasts of Heat waves in West African cities, NHESS (Langue et al., 2023)**

The present study addresses the predictability of different heat wave types at the sub-seasonal timescale in West African cities over the period 2001-2020. The authors evaluate heatwave predictability in 2 state of the art sub-seasonal forecast models (46 forecast days), using two of the best reanalysis data sets available.

Overall, I find that the authors demonstrate their findings with a very nice sequence of Figures. However, sometimes important conclusions are derived about Tmax without demonstrating the Tmax plots, even though they can easily be added together with the respective Tmin in the Figures that exist in the main manuscript, or simply shown in the appendix.

Methodologically, I find very appropriate that the authors use several variables and several skill metrics in their analysis. Specifically, the authors proceeded with the evaluation of 3 variables of high interest and usability for heatwave definitions and heatwave research (Tmin, Tmax, Twet\_bulb). The skill of the models to detect heat extremes is evaluated using the Brier score and the CRPS, while the predictability of heat waves in the forecast models is assessed by calculating categorical metrics such as the hit-rate, the Gilbert score, and the false alarm ratio (FAR). The results of this study (after Figure4) are based on the percentile threshold selected for detecting extremes, as the authors create a 0-1 vector containing ones for days indicating extremes.

Unfortunately, I find that the percentile threshold selected for the detection of extremes is subjective and does not consider the model drift increase with lead time. The model drift is investigated in the following study and nicely shown in Figure 1: <https://doi.org/10.1029/2019MS001751>.

We agree with the reviewer that in general, forecast models present a drift which increases with the lead time. The selection of 90th percentile threshold is supported by previous studies on heat waves and their impacts on human

health (e.g., Fischer and Schär, 2010; Perkins et al., 2012; Perkins and Alexander, 2013; Fontaine et al., 2013; Russo et al., 2016; Lavaysse et al., 2018; Ngoungue et al., 2023).

The 90th percentile threshold the authors select is calculated over every calendar date and then the minimum percentile out of those is considered as a threshold for the full 46-day ECMWF forecast. The authors claim that they keep the selection of threshold constant, due to the relation of the study to a project investigating human impacts of climate extremes. However, this choice is still not justified, since this is a percentile threshold that the authors calculated. Normally human health impact studies do not use percentile thresholds, but actual temperature in degrees, e.g., 28 C. Moreover, this study is still a model evaluation study and, as the authors mention in the conclusions, the results will be used to investigate in detail the origins of the differences observed in the two forecast models over the different regions.

We want to clarify this point. The detection of heat waves is processed using the daily climatological 90th percentile computed over the study period as threshold. After the detection of heat waves is addressed, we compute their intensity using a constant threshold defined as the minimum daily climatological 90th percentile. The intensity is defined as the sum of the daily exceedance of the indicators from this constant threshold.

Normally, in sub-seasonal time scales, another 90th percentile threshold will be calculated for, e.g., August 1st for an initialization on July 31st and another 90th percentile threshold will be calculated for August 1st for an initialization on July 15th . However, a technique like that is not followed, so the threshold selection of the authors leads in many cases to better model skill in terms of CRPS and Brier score at lead week-5 instead of lead week-2.

That's a good point. In fact, that's what we've done: the 90th percentile threshold is calculated separately for each initialisation of the models. For example, when using UKMO, the threshold is calculated four times a month according to the different initialisation dates (1st, 9th, 17th and 25th). Heatwave detection is also processed at different initialisation dates. The

results were quite surprising, but this behavior in the models can be explained by the fact the predictability limit is reached too early after week 2.

Moreover, the authors claim that the results of lead week 1 and lead week 2 are similar, which is a discrepancy to other studies. The reason for this discrepancy might again be the threshold selected. Moreover, if the authors want to support such argument, they could at least show some figures in the appendix.

We added some figures on the evolution of evaluation metrics for different weeks.

This study presents important research in the field of sub-seasonal prediction for a region that lacks evaluation studies. However, the authors' conclusions cannot be supported by the current analysis. My recommendation is to reconsider the manuscript after major revisions focused on a correct estimation of thresholds. A more detailed review per section is provided below.

Thanks to the reviewer for taking the time to revise this paper.

**Abstract:**

1. The conclusions given in lines 10-15 are not supported by the current results. Even though the Brier score is lower than 0.1 in many cases, from the metrics shown Figure 10 we can deduce that the model shows no skill in detecting heat waves.

We do not agree with the reviewer on this point. The conclusions given here are supported by the results obtained with the Gilbert skill score in Figure 10, which in many cases shows values greater than zero.

A general comment to that is the distinction made by the authors between heatwave detection and heatwave prediction. Isn't for a forecast model the heatwave prediction a synonym to a heatwave "detection"?

We agree with the reviewer that for a forecast model, the prediction of heat waves is synonymous to the detection of heat waves. We replaced "prediction" by "detection" in the manuscript.

All metrics used are valuable for the evaluation of the model, as this study shows that an apparently low CRPS and Brier score is not a synonym to the model's ability to separate extreme heat from non-extreme heat.

In this study, we found high CRPS values, greater than 1, which indicate biases in the prediction of the T2m and Tw variables. These biases are considerably reduced when the predictability of extreme heat days is assessed using the Brier score (days with T2m or Tw above the 90th percentile of T2m or Tw respectively).

2. Please replace the expression "the model shows skills" throughout the manuscript.

This expression is supported by the results found with the Gilbert Skill score and hit-rate in Figure 10.

### **Introduction:**

1. I was very confused by the fact that the title and the introduction have a lot of material about the seasonal time scale and that the authors claim that they will evaluate this time scale as well. However, the authors use sub-seasonal forecasts going maximum to 6 weeks lead time, so 1.5 months. The authors should better define time scales in the introduction. The sub-seasonal time scale covers 2 weeks to 2 months. The definition can be found in the S2S project here:

<https://public.wmo.int/en/resources/bulletin/subseasonal-seasonal-prediction-project-bridging-gap-between-weather-and-climate>

Following this comment, I recommend that the authors should not refer on their intro or anywhere else in the manuscript to the seasonal time scale.

This is a good point, we kept only the subseasonal time scale in the manuscript.

2. I really liked the part where the evaluation is done at the city scale. We do not normally see that in sub-seasonal prediction studies and it adds novelty to this study.

Thanks to the reviewer for this appreciation.

## Methodology:

Line 214: Do the authors mean that they calculate the daily climatological 90th percentile threshold? So, this threshold should vary depending on the time of the year, right? Is the 90-percentile calculated separately for forecast model, reanalysis data, and station data?

Yes, we computed the daily climatological 90th percentile and we agree with the reviewer that the threshold varies depending on the time of year. The 90-percentile is computed separately for the forecast model and the reanalysis data. We clarified it in the manuscript :

“The 90th percentile is calculated for each calendar day of the year and separately for the forecast models and the reanalysis data.”

The authors return to the explanation of the 90-percentile definition in the line 233 and state “...daily exceedances of daily values of indicators to the climatological daily threshold ” which kind of agrees with the statement above but then in lines 236-238 they state: “Therefore, the climatological daily threshold is chosen to be constant over the whole period; and it is defined as the minimum of the daily climatology thresholds over the study period. This approach allows us to properly assess the severity of a heat wave and its potential human impacts.” At the end what is it exactly that the authors do?

After processing to heat wave detection using the 90th percentile climatology threshold, we computed their intensity using this time the minimum of the daily climatological 90 th percentile over the study period.

We clarified this point in the manuscript, as follow:

“The intensity of a heat wave was defined as the sum of the daily exceedances of the indicators values to the climatological threshold during the event. This study is in the framework of the project Agence National de la Recherche STEWARD (STatistical Early WArning systems of weather-related Risks from probabilistic forecasts, over cities in West Africa) project which focuses on the human impacts of climate extremes. Therefore, the climatological daily threshold for the computation of heat wave intensity is chosen to be constant over the whole period. It is defined as the minimum of

the daily climatology thresholds over the study period. This approach allows us to properly assess the severity of a heat wave and its potential human impacts.”

Also, as previously mentioned, a lead time dependent percentile should be considered.

This point has been clarified in a previous comment.

Line 226: I thought the authors mentioned before in their manuscript that they assess separately wet and dry heatwaves. Why then your binary vector contains data from extreme values of all temperature variables?

Yes that is actually what we did, the boolean files were created separately for each variable T2m\_min, T2m\_max and Tw. We clarified it in the manuscript:

“To determine the occurrence and duration of heat waves, we create individual boolean files from the T2m\_min, T2m\_max and Tw time series at each grid point, containing 1 if hot days and 0 otherwise. This operation is performed on a daily time scale over the period studied. Hot days are days on which the values of T2m\_min, T2m\_max or Tw are above the daily 90th percentile thresholds. In order to assess the characteristics of heat waves, only hot days belonging to heat wave sequences are considered (Ngoungue et al. 2023). Boolean files are calculated separately for reanalyses and forecasts in order to assess the representation of heat wave occurrence and duration.”

Major comment for methodology: The predictability of a model should not be assessed only by comparing to a random chance, as this would not make a strong argument into using this forecast model. The authors should assess predictability by comparing to a reference forecast. For example, the Brier skill score could be calculated separately for two common reference forecasts, being the climatological forecast and the persistence forecast.

In this study, the detection of heat waves in the forecast models is done using two types of metrics : general score (CRPS, Brier) and skill scores (GSS,Hit,FAR). The CRPS and Brier Score are used to have an overview of the forecast skills,

and the GSS,Hit,FAR are used to assess the skills of the models with respect to climatology.

## Results:

**Section 3.1:** Calculating forecast climatologies for a sub-seasonal forecasting system that provides forecast over sub-seasonal lead times (maximum 6 weeks) does not mean that the evaluation done here is an evaluation of seasonal forecasts (also the title of the manuscript states that). The authors do not evaluate the seasonal predictability of the forecast system, as this model cannot provide a seasonal prediction. The authors basically provide the climatological biases of the sub-seasonal forecasting systems over the different seasons. Seasonal forecasting means that the forecasting system provides at lead-zero more than 8 weeks forecast, which is completely different with calculating climatologies. Other than that, I find this section very interesting, as we can conclude during which seasons the sub-seasonal forecasts have the largest biases over west Africa.

We changed the time scale according to the reviewer's comment.

**Section 3.2:** As seen in the supplementary material of the previous section, the climatology is lead time dependent and therefore crucial for understanding whether the model predicts an extreme or not. I think that this would significantly change the results on predictability of this study and the authors would also see important differences between lead week 1 and lead week 2. For example, the outcome stated in lines 335-336 ("We have noticed that the skill of the models does not improve necessarily with decreasing lead time.") is related to the choice of climatological distribution.

Here are some presentations from the ECMWF where they explain the calculation of the lead time dependent climatology:

Example for seasonal forecasts:

<https://confluence.ecmwf.int/pages/viewpage.action?pageId=174864039>

Model climate calculation in page 33:

[https://resources.eumetrain.org/data/7/711/high\\_latitudes\\_ew\\_2023\\_slc.pdf](https://resources.eumetrain.org/data/7/711/high_latitudes_ew_2023_slc.pdf)

Demonstration on how lead time affects EFI verification in page 34. Have a look on known issues on page 35, that is also why in the current study the Thursday initializations should not have been removed as it drastically affects sample size:

[https://www.google.com/url?sa=t&rct=j&q=&esrc=s&source=web&cd=&ved=2ahUKEwiT2\\_GgwKeBAxWUUh\\_0HHZtzD-oQFnoECA4QAQ&url=https%3A%2F%2Fconfluence.ecmwf.int%2Fdownload%2Fattachments%2F70951731%2FForecasting\\_Extremes\\_Oct2017.pdf%3Fapi%3Dv2&usg=AOvVaw3YVIL5ZgSZsAzDf-LKflzI&opi=89978449](https://www.google.com/url?sa=t&rct=j&q=&esrc=s&source=web&cd=&ved=2ahUKEwiT2_GgwKeBAxWUUh_0HHZtzD-oQFnoECA4QAQ&url=https%3A%2F%2Fconfluence.ecmwf.int%2Fdownload%2Fattachments%2F70951731%2FForecasting_Extremes_Oct2017.pdf%3Fapi%3Dv2&usg=AOvVaw3YVIL5ZgSZsAzDf-LKflzI&opi=89978449)

Thanks to the reviewer for these references.

Line 338: Could the authors explain why the forecast models show better predictive skill in the AT region?

This result can be explained by the fact that T2m signals (min, max) show lower daily variability in the AT region.

### **Section 3.3.1:**

Lines 354-355: The authors state “This approach based on a relative threshold (see section 2.4.3) will contribute to partially correct the biases previously found in the models.” How does a variable daily threshold correct bias? A daily threshold simply accounts for differences between seasons.

This is a good point. The first evaluation of the forecast models was carried out by calculating the bias and the CRPS score using the raw forecasts. Next, we focused on extreme events (days with a temperature above the 90th percentile), so the raw forecasts were transformed into a Boolean vector containing 1 if the days are warm and 0 if they are not.

We added this information to the manuscript :

“By using a percentile-based approach, we are not focusing on the intensity of extreme events but on the number of events above the threshold. This explains why the Brier score values are quite good compared to the CRPS score.”



408-409: The authors state “The forecast models show skills above the reference both for short- and long- term forecasts (Week2, Week5)”

I am wondering which figure shows that there is skill above the reference. Moreover, when the authors say skill, they should specify the metric to which they refer to. Taking into account the pairs of FAR and Hit\_rate, Figure 10 shows no skill in detecting/predicting heat waves for none of the seasons/ models/ lead weeks.

In Figure 10, we evaluated the skills of the models on heat wave forecasting with respect to ERA5 reanalysis. As mentioned in the main text, the climatology reference is defined as the probability of having a heat wave in the ERA5 reanalysis over the period 2001-2020. We found higher values of hit-rate and GSS with respect to the reference both at medium and long range forecasts, which indicates that the models show skills above climatology.

410: Do the authors here mean instead of “more skills”, “higher skill scores”?

We rephrased this sentence in the manuscript:

“ECMWF presents higher skills than UKMO for short-term forecasts in winter.”

Figure 10: Why is only the evaluation for T\_min shown? The authors could add Tmax evaluation in Figures 10 and 11.

We added plots showing the evaluation for T\_max in Figures 10 and 11.

The authors state “We can infer from this result that nighttime heat waves are more predictable than daytime heat waves.” Is there a Tmax figure I missed from which the authors infer this? Moreover, if that is indeed shown on a figure, is the reason for the higher predictability the actual 90th percentile metric used which could be more variable in Tmax and that is why it appears less predictable.

We added a plot showing the evaluation for T\_max in Figures 10.

Also, why do the authors not provide the evolution of the mean climatological biases between the forecast models and reanalyses for Tmax in the Appendix as provided for Tmin and Tw in S2 and S3?

We added a plot on the evolution of the mean climatological biases using Tmax.

The authors should avoid the expression "the models show more skills". It should be rephrased to "the models show higher Brier skill in ...

Thanks to the reviewer for this suggestion.

415: What is an inter-day variability? Is it the std calculated over all your samples per region?

The inter-day variability represents the daily variability of the indicators (T2m\_min, T2m\_max and Tw) over the season. Yes, the Std is computed for each indicator over the different regions.

We clarified it in the manuscript :

"The daily variability of T2m is assessed by calculating the standard deviation (std) for each region using ERA5 reanalysis."

416-417 Can the authors explain more this sentence: The low inter-day variability of T2m in the AT region indicates a more stable signal which will lead to favorable conditions for heat wave detection in the models based on a statistical perspective. Wouldn't a stable signal lead to lower probability of extremes, so an even harder prediction of heatwaves?

The low daily variability of T2m in the AT region indicates a more stable signal.

We added this information to the manuscript :

"From a statistical point of view, this will contribute to the occurrence of heat waves, as the probability of having consecutive days above the threshold is higher in a stable signal than in one with high daily variability."

Line 426: By "significantly decreasing" do the authors mean that they have calculated a level of significance? Do maybe the authors mean that the values are strongly decreasing? Or maybe they mean that the values are strongly decreased. In any case, GSS values that go from 0.2 to 0.1 are not strongly decreased, are low overall.

We clarified it in the manuscript:

"We found that the GSS values are low overall lead time and season; the highest values are observed in winter."

432: The use of the word “ability” in this sentence is misleading. Is it an ability to predict events that did not occur?

We replaced the word “ability” in the manuscript:

“An important parameter of a forecast system is its reliability in predicting events. This property is assessed using the False Alarm Ratio: Do the events predicted by the models always occur in the reanalysis?”

The authors provide the T<sub>min</sub> variable in Figure 10 and in Figure S15. What is the difference in the 2 plots?

In Figure 10, the evaluation metrics were computed at daily time scale using T2m<sub>min</sub>, while in Figure S15, the metrics are computed at weekly time scale.

Why there are no Tw and Tmax plots provided in the appendix?

We added plots on Tw and Tmax in the appendix

In Figure 10 which percentile threshold of ensemble members is used? The authors should add this in the figure caption.

We added the information on the caption.

“Figure 10 : Evaluation of heat waves detection in the forecast models with respect to ERA5 at daily time scale over the period 2001-2020 using T2m<sub>min</sub> values for : (a-d) hit-rate, (e-h) FAR ratio and (i-l) GSS. The metrics were computed using the optimized forecasts with the 20% threshold (see section Methods for the optimisation of the ensemble forecasts). The metrics were calculated during the seasons : (a,e,i) winter; (b,f,j) spring; (c,g,k) summer and (d,h,l) autumn. The cyan and black borders of bar plots indicate the metrics obtained when using ECMWF and UKMO respectively. The Y and X axes show the metrics values and the lead times (W2: week2 and W5: week5) respectively. The horizontal red line represents the baseline climatology.”

445: How did the authors get to this conclusion: “The forecast models show skills at weekly time scale compared to the baseline climatology.” Calculating the Brier skill score using the climatological forecast as reference could support (or not) this statement.

As mentioned in the methods section, heat wave predictability is carried out on daily and weekly time scales. For each time scale, the Hit-rate, FAR and GSS are calculated. The results in Figure S15 show higher values of Hit-rate,

FAR and GSS at weekly time scale compared to the climatology of heat waves in ERA5.

Figure 10 shows that, according to the evaluation done here, the model is over-forecasting heatwaves. This can be even more explicitly shown if the authors plot hit rate against FAR to create the Roc curve. In this curve, the pair of 0.55 hit rate – 0.75 FAR will be below the diagonal. Being below the diagonal indicates no skill to discriminate between events and no-events, with the diagonal indicating random value/no-skill. This plot would disagree with the conclusion drawn by GSS.

This is actually a good point, but the choice of measurements for heatwave forecasting depends on the applications we want to achieve. For example, political decision-makers will be interested in a reliable system that issues correct warnings, and therefore in FAR. Weather center forecasters, on the other hand, will want to predict events correctly and will therefore be interested in the hit rate. Consequently, the use of the Roc curve can be confusing in some applications. A more complete score, commonly used, is the Gilbert skill score, which takes into account hits, false alarms, misses and correct rejections.

FIGURE 11: The markers have very small size, and so are hard to see. Here the authors could easily plot Tmax values as well, which is a very valuable parameter for heatwaves and its important to see its model biases here as well. I would suggest that the authors create one row for each variable (Tmin,Tmax, Tw) and maybe show both models in every sub-panel.

We followed the suggestion of the reviewer.

### **Minor comments:**

Line 24 needs some references.

We added the following reference:

“Russo et al., 2017: Humid heat waves at different warming levels, Nature Publishing Group UK London”

Line 37: That is a very big list of references, just to reference daily raw temperature as a variable relative for heatwaves. In the case of simple definitions, it would be helpful to keep the reference lists shorter and target to show the references that are the most relevant.

We followed the suggestion of the reviewer and reduced the list of references.

Line 45-46 "This is usually done using seasonal weather forecast models." This sentence needs references.

We added some references according to the reviewer:

Connor et al., 2008: Integration of seasonal forecasts into early warning systems for climate-sensitive diseases such as malaria and dengue. *Seasonal Forecasts, Climatic Change and Human Health: Health and Climate*, 71-84.

Shukla et al., 2019: Assessing North American multimodel ensemble (NMME) seasonal forecast skill to assist in the early warning of anomalous hydrometeorological events over East Africa. *Clim Dyn* **53**, 7411–7427 (2019).

Montes et al., 2022: Developing a framework for an early warning system of seasonal temperature and rainfall tailored to aquaculture in Bangladesh. *Climate Services*, *26*, 100292.

Also, since the study is also for sub-seasonal time scales it would be great if the authors motivate the sub-seasonal time scale and add references with studies connecting early warnings with the sub-seasonal time scale.

One reference I have in mind is:

Osman et al., 2023: Sub-seasonal to decadal predictions in support of climate services DOI: 10.1016/j.cliser.2023.100397

Thanks to the reviewer for this suggestion, we added some references.

Line 51: There is a published study on the predictability of extreme events across the globe: Advances in the Sub-seasonal Prediction of Extreme Events: Relevant Case Studies across the Globe

Domeisen et al., 2022, DOI: <https://doi.org/10.1175/BAMS-D-20-0221.1>

We added this reference to the manuscript.

Also, overall, for the onset/intensity/duration of European heatwaves at sub-seasonal time scales, where the calculation of lead-time dependent climatology is also explained:

Subseasonal predictability of onset, duration, and intensity of European heat extremes Pyrina et al., 2022, <https://doi.org/10.1002/qj.4394>

Thanks to the reviewer for this suggestion.

Line 66: "Expert Team on Climate Change Detection and Indices (ETCCDI) database," also needs a reference.

We added a reference to the manuscript.

Line 67: What is the apparent temperature?

We added this information in the manuscript.

"Apparent temperature represents the temperature actually felt by humans, caused by the combined effects of air temperature, relative humidity and wind speed."

65-71: I find this paragraph very long and confusing especially because it is not going to be related to the method that will be used in the current paper. I would either remove it or keep a few sentences about it. Also, the paragraph goes on about what other studies did but there is no connection to what will be done here.

We reduced the paragraph :

"To assess the skills of the models, they used indices from the Expert Team on Climate Change Detection and Indices (ETCCDI, \citep{omondi2014changes}) database based on the apparent temperature and 2-meter temperature. Apparent temperature represents the temperature actually felt by humans, caused by the combined effects of air temperature, relative humidity and wind speed. They found that at the seasonal time scale, the skills of MF5 to reproduce inter-annual anomalies of heat wave duration is limited at the grid point level because of the high spatial variability in the region. At sub-seasonal time, they showed that the skills of the model decrease beyond one week."

The method of Lavaysse et al., 2019 is mentioned later, but it would be nice to also mention a few sentences about their method and why is good and you have followed it here. Also, the Lavaysse et al., 2019 study could be mentioned before, when talking about the heatwave studies, so that the reader connects the study already with heatwave evaluation.

We added this information to the manuscript :

"This method is more robust because the occurrence and duration of heatwaves are assessed directly using daily minimum or maximum temperatures. This involves the computation of evaluation metrics to assess the skills of the forecasts."

Line144: Please provide a citation from a publication or a book. Citations of web pages are not proper for research papers.

We added the following reference:

"Ngoungue et al., 2023 : heat waves monitoring over West Africa cities : uncertainties, characterization and recent trends."

Lines 167-169: I do not understand the meaning of this sentence, was there a problem with the ECMWF output? Why would you choose to not evaluate all available initializations and reduce so much your sample size? A more accurate approach would be to evaluate the hindcasts for another operational model version, such as the model version of 2021, 2022, or even 2019.

We clarified this point in the manuscript :

"We only analyzed the hindcasts produced on Thursday. This is because we firstly want to carry out a multi-model analysis. According to a first investigation on the initialization dates of the hindcasts of different models, we found that most of the models were initialized on the same date as ECMWF (Thursday of each week)."

Line 183: Here it is stated that the authors are "interested in the predictability of heat waves in a global perspective", which is confusing as it may be understood that the evaluation will be done for the whole globe.

We changed this sentence in the manuscript :

“We are aware that these initialization dates are not the same as those of ECMWF, but we are interested in this work on the predictability of heat waves in a broad perspective, not on specific events.”

Also, what is stated in the sentence is not a good argument on why using different weekly initializations are comparable. The authors could just say that using ECMWF initializations on Thursdays leads to 4 initializations per month, making the sample size comparable to the UKMO model.

We don't completely agree with the reviewer on this point, because sometimes, when we use ECMWF initialisations on Thursdays, we have 5 initialisations per month (e.g., April, July, September, December).

Figure 3: The authors cannot name a) for T2m\_min and a) as well for winter. You could do i) t2m\_min, ii) tm\_max.

We followed the suggestion of the reviewer.

Figures 3,4: It should be mentioned in the figure that the authors consider all available lead times for this figure.

We followed the suggestion of the reviewer.

Figures 5,6:

1. For each of the variables investigated (Tmin, Tmax, Tw) when are there the stronger climatological biases? How much do they change if we consider a lead time dependent percentile threshold?

Strong climatological biases with Tmin, Tmax and Tw are found during Winter. The computation of the percentile threshold is done separately for each lead time.

2. In many cases the skill increases with lead time, which is not common at all especially comparing forecast weeks 2 and 5. Is the change in skill driven by some particularly well predicted period of extremes at lead week 5? Or maybe it comes by the fact that the authors define a common 90 percentile threshold for all lead times?



This is actually a good point, we thought that this behavior in the models is driven by the atmospheric conditions occurring during week 5 are more stable than week 2 leading to good predictions.

According to the error metrics of figures 5c and 6c, a conclusion would be that the users should trust the summer prediction over the CO region at lead week 5 more than at lead week 2! This result is even more striking when looking at the winter season and Tw in figure S6.

We do not totally agree with the review, we can conclude based on ERA5 reanalysis that UKMO model is slightly better at Week 5 than Week 2 for T2m\_min in the CONT region during summer. We added this information in the manuscript.

Figure 7,8: The authors should explain what the grey values represent in the plots.

We added this information in the captions

Line 322: Actually, there are systematic decreases and increases in biases with lead time in several subplots. For example, the bias is especially pronounced for ERA5 in the region CO (S2-a,f,h,e and in S3-everywhere). Why do some of the biases decrease with lead time? Can the authors explain some of these results or at least mention them?

This is actually a good point. In this study, we do not focus on specific events during the season, but on the evolution of T2m and Tw at daily time scale in the models. The decrease in bias with the lead time from week 1 to week 6 can be explained by the fact that the models reach the predictability horizon too early and also by the presence of more complex atmospheric conditions at short lead time.

Figures 7, 8 Why would the authors indicate a colorbar without units? Here it should be Bias (%)

We added units in the colorbar.

Figure 9 Again here why having a colorbar without units? Especially with your duration definition that is very important. Please change to: Bias (days per year)

We added units in the colorbar.

--The long text in each section is hard to read and makes it hard to return to a specific point when needed. Please separate the long text of each section in paragraphs. See here some tips:

<https://www.uvic.ca/learningandteaching/assets/docs/instructors/for-review/Information%20for%20Students/science%20paragraphs.DVG.FINAL.pdf>

Thanks to the reviewer for this suggestion.

--Some figures have: "FAR ratio", but ratio is inside the word FAR anyway. Change to: "FAR".

We changed it in the document.

479: How do the authors know that the models have issues with the "spatial evolution of heat waves"? Do they mean spatial variability?

We replaced the expression "spatial evolution of heat waves" by "spatial variability of heat waves".

### **Conclusion section:**

This section should be rewritten after the revision of this study.

The section is rewritten according to the reviewer comments and the overall modifications (see new conclusion).

Typos:

Line 99: The references need brackets: Moron et al. (2016); Ngoungue Langue et al. (2023)

We corrected it according to the reviewer.

Line 182: Change "init dates" to "initialization dates"

We corrected it according to the reviewer.

Line 251: Change in the “The skill of the probabilistic models ... are assessed...”  
to “...is assessed...”

We corrected it according to the reviewer.

Line 236: remove ;

We corrected it according to the reviewer.
